# Supplementary material
Source: HighWire-hosted journal article supplement (https://erj.ersjournals.com/content/60/3/2200009)

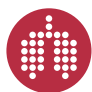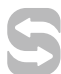

SHAREABLE PDF

# Effects of COVID-19 protective face masks and wearing durations on respiratory haemodynamic physiology and exhaled breath constituents

Pritam Sukul, Julia Bartels, Patricia Fuchs, Phillip Trefz, Rasmus Remy, Leo Rührmund, Svend Kamysek, Jochen K. Schubert and Wolfram Miekisch

Rostock Medical Breath Research Analytics and Technologies (ROMBAT), Dept of Anaesthesiology and Intensive Care, University Medicine Rostock, Rostock, Germany.

Corresponding author: Pritam Sukul ([pritam.sukul@uni-rostock.de](mailto:pritam.sukul@uni-rostock.de))

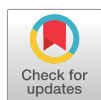

Shareable abstract (@ERSpublications)

While assumed to protect against SARS-CoV-2 transmission, face masks cause various physiometabolic side-effects and changes in exhaled VOC profiles. Effects are more pronounced in FFP2 masks and are profound at age  $\geq 60$  years. <https://bit.ly/33fzOMA>

**Cite this article as:** Sukul P, Bartels J, Fuchs P, *et al.* Effects of COVID-19 protective face masks and wearing durations on respiratory haemodynamic physiology and exhaled breath constituents. *Eur Respir J* 2022; 60: 2200009 [DOI: 10.1183/13993003.00009-2022].

This single-page version can be shared freely online.

Copyright ©The authors 2022.

This version is distributed under the terms of the Creative Commons Attribution Non-Commercial Licence 4.0. For commercial reproduction rights and permissions contact [permissions@ersnet.org](mailto:permissions@ersnet.org)

Received: 27 Sept 2021

Accepted: 3 Feb 2022

## Abstract

**Background** While assumed to protect against coronavirus transmission, face masks may have effects on respiratory–haemodynamic parameters. Within this pilot study, we investigated immediate and progressive effects of FFP2 and surgical masks on exhaled breath constituents and physiological attributes in 30 adults at rest.

**Methods** We continuously monitored exhaled breath profiles within mask space in older (age 60–80 years) and young to middle-aged (age 20–59 years) adults over the period of 15 and 30 min by high-resolution real-time mass-spectrometry. Peripheral oxygen saturation ( $S_{pO_2}$ ) and respiratory and haemodynamic parameters were measured (noninvasively) simultaneously.

**Results** Profound, consistent and significant ( $p \leq 0.001$ ) changes in  $S_{pO_2}$  ( $\geq 60$ \_FFP2-15 min:  $5.8 \pm 1.3\%$ ↓,  $\geq 60$ \_surgical-15 min:  $3.6 \pm 0.9\%$ ↓,  $< 60$ \_FFP2-30 min:  $1.9 \pm 1.0\%$ ↓,  $< 60$ \_surgical-30 min:  $0.9 \pm 0.6\%$ ↓) and end-tidal carbon dioxide tension ( $P_{ETCO_2}$ ) ( $\geq 60$ \_FFP2-15 min:  $19.1 \pm 8.0\%$ ↑,  $\geq 60$ \_surgical-15 min:  $11.6 \pm 7.6\%$ ↑,  $< 60$ \_FFP2-30 min:  $12.1 \pm 4.5\%$ ↑,  $< 60$ \_surgical-30 min:  $9.3 \pm 4.1\%$ ↑) indicate ascending deoxygenation and hypercarbia. Secondary changes ( $p \leq 0.005$ ) to haemodynamic parameters (*e.g.* mean arterial pressure (MAP)  $\geq 60$ \_FFP2-15 min:  $9.8 \pm 10.4\%$ ↑) were found. Exhalation of bloodborne volatile metabolites, *e.g.* aldehydes, hemiterpene, organosulfur, short-chain fatty acids, alcohols, ketone, aromatics, nitrile and monoterpene mirrored behaviour of cardiac output, MAP,  $S_{pO_2}$ , respiratory rate and  $P_{ETCO_2}$ . Exhaled humidity (*e.g.*  $\geq 60$ \_FFP2-15 min:  $7.1 \pm 5.8\%$ ↑) and exhaled oxygen (*e.g.*  $\geq 60$ \_FFP2-15 min:  $6.1 \pm 10.0\%$ ↓) changed significantly ( $p \leq 0.005$ ) over time.

**Conclusions** Breathomics allows unique physiometabolic insights into immediate and transient effects of face mask wearing. Physiological parameters and breath profiles of endogenous and/or exogenous volatile metabolites indicated putative cross-talk between transient hypoxaemia, oxidative stress, hypercarbia, vasoconstriction, altered systemic microbial activity, energy homeostasis, compartmental storage and washout. FFP2 masks had a more pronounced effect than surgical masks. Older adults were more vulnerable to FFP2 mask-induced hypercarbia, arterial oxygen decline, blood pressure fluctuations and concomitant physiological and metabolic effects.

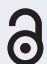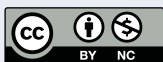

Supplement: inline-supplementary-material-2 [file inline-supplementary-material-2.pdf]
