# Supplementary material
Source: HighWire-hosted journal article supplement (https://erj.ersjournals.com/content/60/3/2200009)
Supplement: inline-supplementary-material-1 [file inline-supplementary-material-1.pdf]

# **Effects of COVID-19 protective face-masks and wearing durations onto respiratory-hemodynamic physiology and exhaled breath constituents**

Pritam Sukul<sup>1\*</sup>, Julia Bartels<sup>1</sup>, Patricia Fuchs<sup>1</sup>, Phillip Trefz<sup>1</sup>, Rasmus Remy<sup>1</sup>, Leo Rührmund<sup>1</sup>, Svend Kamysek<sup>1</sup>, Jochen K Schubert<sup>1</sup>, Wolfram Miekisch<sup>1</sup>

<sup>1</sup>*Rostock Medical Breath Research Analytics and Technologies (ROMBAT), Dept. of Anesthesiology and Intensive Care, University Medicine Rostock, Schillingallee 35, 18057 Rostock, Germany*

\*Corresponding author: [pritam.sukul@uni-rostock.de](mailto:pritam.sukul@uni-rostock.de)

## **Supplementary information**

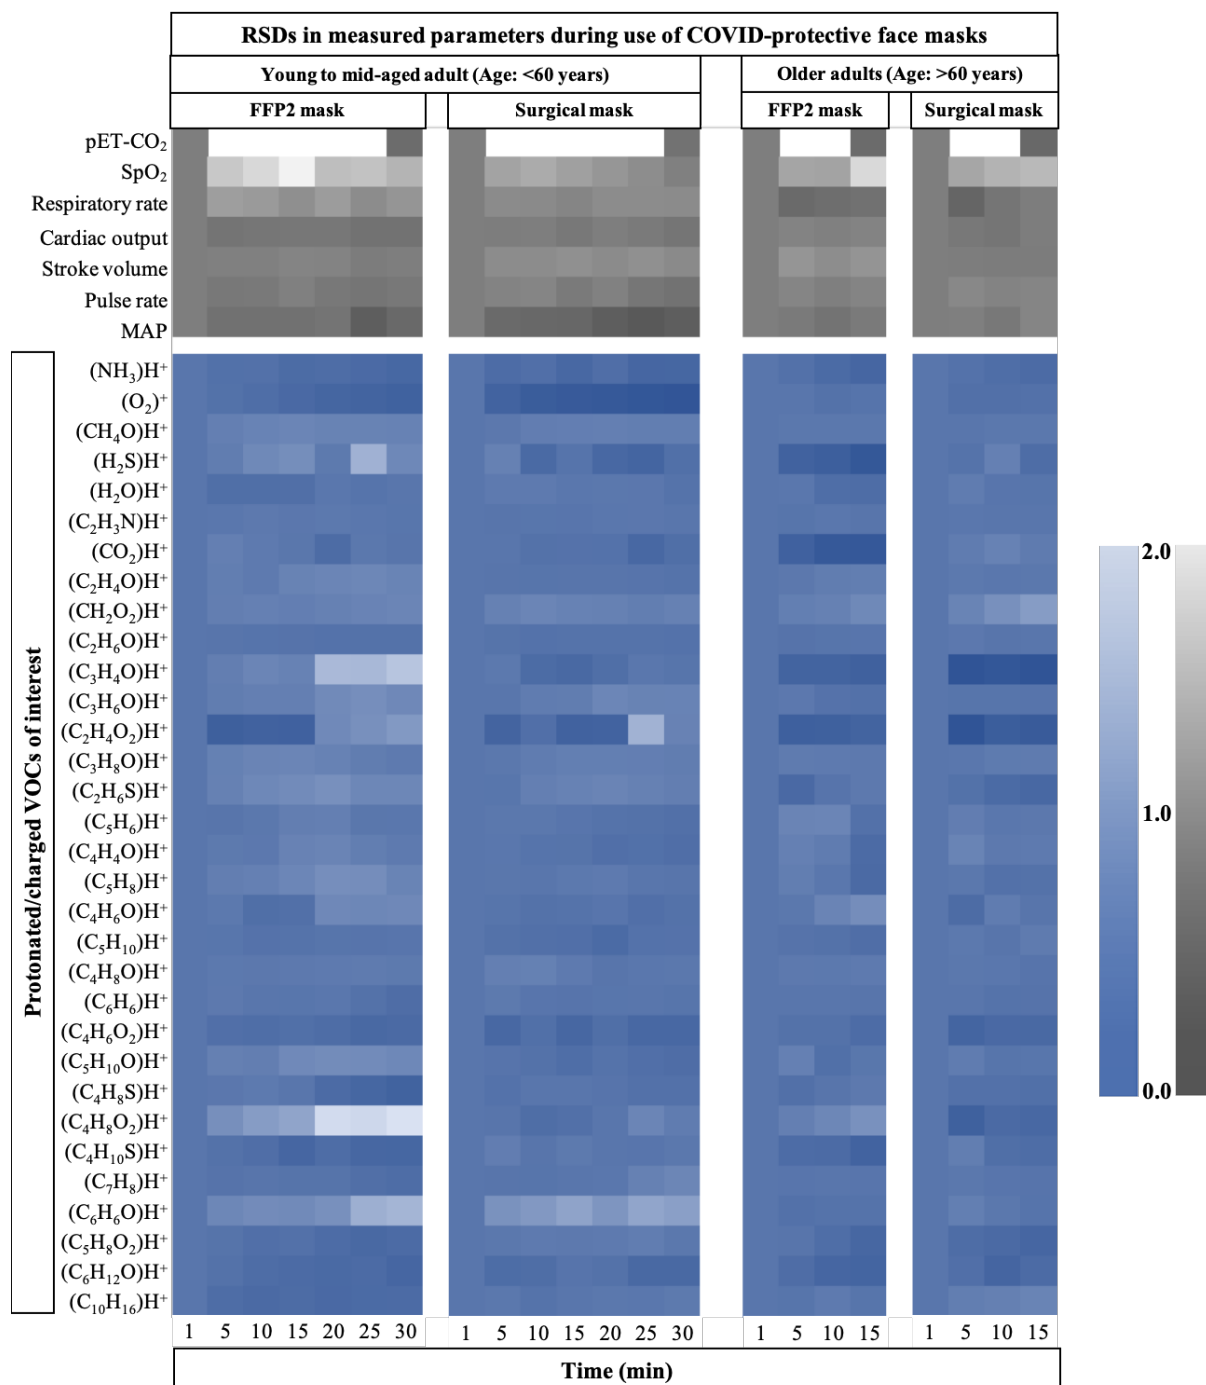

**Supplementary Figure S1: Relative changes in coefficient of variation (RSDs) of physiological parameters and of exhaled alveolar VOCs during the use of COVID-protective face masks by young to mid-aged and older adults.** Y-axis represents the RSDs of physiological parameters viz. pET-CO<sub>2</sub>, SpO<sub>2</sub>, respiratory rate, cardiac output, stroke volume, pulse rate, mean arterial pressure (MAP) and the protonated/charged VOCs of interest. X-axis indicates time in minute. VOCs were tentatively identified according to their mass/charge ratio. For each individual, RSDs of VOCs were normalised onto corresponding values from the first minute. Respiratory-, hemodynamic parameters and SpO<sub>2</sub> are normalized likewise. The normalised RSDs from every 5<sup>th</sup> minute is presented here. The RSDs of pET-CO<sub>2</sub> are presented from immediately before and after mask use and are placed at the first and final minute of heatmaps. Light and dark colours symbolise relatively higher and lower RSDs of measured parameters, respectively.





**Supplementary Table S3: Results from pairwise-multiple comparisons of relative changes (in %) between groups.** Statistical significances are tested by means of repeated measurement-ANOVA on ranks ( $p$ -value  $\leq 0.005$ ). From all pairwise-multiple comparisons, statistically significant difference along with corresponding  $p$ -values are listed with respect to % of changes caused by “FFP2 mask on older adults (FFP2\_15min\_O)”. Statistically significant ( $p$ -value  $\leq 0.005$ ) correlations are assigned in bold.

| SpO <sub>2</sub> | Vs.          | P-value          | Sig.       |
|------------------|--------------|------------------|------------|
| FFP2_15min_O     | FFP2_15min_A | <b>&lt;0.001</b> | <b>Yes</b> |
|                  | FFP2_30min_A | <b>&lt;0.001</b> | <b>Yes</b> |
|                  | Surg_15min_A | <b>&lt;0.001</b> | <b>Yes</b> |
|                  | Surg_30min_A | <b>&lt;0.001</b> | <b>Yes</b> |
|                  | Surg_15min_O | <b>&lt;0.001</b> | <b>Yes</b> |

| RR           | Vs.          | P-value          | Sig.       |
|--------------|--------------|------------------|------------|
| FFP2_15min_O | FFP2_15min_A | <b>&lt;0.001</b> | <b>Yes</b> |
|              | FFP2_30min_A | <b>0.003</b>     | <b>Yes</b> |
|              | Surg_15min_A | 0.212            | No         |
|              | Surg_30min_A | 0.149            | No         |
|              | Surg_15min_O | 0.365            | No         |

| CO           | Vs.          | P-value      | Sig.       |
|--------------|--------------|--------------|------------|
| FFP2_15min_O | FFP2_15min_A | <b>0.002</b> | <b>Yes</b> |
|              | FFP2_30min_A | 0.35         | No         |
|              | Surg_15min_A | <b>0.004</b> | <b>Yes</b> |
|              | Surg_30min_A | 1.471        | No         |
|              | Surg_15min_O | <b>0.005</b> | <b>Yes</b> |

| Exhaled O <sub>2</sub> | Vs.          | P-value          | Sig.       |
|------------------------|--------------|------------------|------------|
| FFP2_15min_O           | FFP2_15min_A | <b>&lt;0.001</b> | <b>Yes</b> |
|                        | FFP2_30min_A | 0.266            | No         |
|                        | Surg_15min_A | <b>0.002</b>     | <b>Yes</b> |
|                        | Surg_30min_A | <b>&lt;0.001</b> | <b>Yes</b> |
|                        | Surg_15min_O | 1.567            | No         |

| Isoprene     | Vs.          | P-value          | Sig.       |
|--------------|--------------|------------------|------------|
| FFP2_15min_O | FFP2_15min_A | <b>&lt;0.001</b> | <b>Yes</b> |
|              | FFP2_30min_A | <b>0.002</b>     | <b>Yes</b> |
|              | Surg_15min_A | 1.453            | No         |
|              | Surg_30min_A | <b>0.005</b>     | <b>Yes</b> |
|              | Surg_15min_O | <b>0.001</b>     | <b>Yes</b> |

| DMS          | Vs.          | P-value          | Sig.       |
|--------------|--------------|------------------|------------|
| FFP2_15min_O | FFP2_15min_A | <b>0.003</b>     | <b>Yes</b> |
|              | FFP2_30min_A | <b>&lt;0.001</b> | <b>Yes</b> |
|              | Surg_15min_A | 0.75             | No         |
|              | Surg_30min_A | <b>0.004</b>     | <b>Yes</b> |
|              | Surg_15min_O | 0.368            | No         |

| Acetaldehyde | Vs.          | P-value      | Sig.       |
|--------------|--------------|--------------|------------|
| FFP2_15min_O | FFP2_15min_A | 1.81         | No         |
|              | FFP2_30min_A | 2.065        | No         |
|              | Surg_15min_A | 0.05         | No         |
|              | Surg_30min_A | 0.021        | No         |
|              | Surg_15min_O | <b>0.001</b> | <b>Yes</b> |

| Ethanol      | Vs.          | P-value      | Sig.       |
|--------------|--------------|--------------|------------|
| FFP2_15min_O | FFP2_15min_A | 0.006        | No         |
|              | FFP2_30min_A | <b>0.001</b> | <b>Yes</b> |
|              | Surg_15min_A | 0.031        | No         |
|              | Surg_30min_A | 0.4          | No         |
|              | Surg_15min_O | <b>0.003</b> | <b>Yes</b> |

| pET-CO <sub>2</sub> | Vs.          | P-value          | Sig.       |
|---------------------|--------------|------------------|------------|
| FFP2_15min_O        | Surg_30min_A | <b>&lt;0.001</b> | <b>Yes</b> |
|                     | FFP2_30min_A | <b>&lt;0.001</b> | <b>Yes</b> |
|                     | Surg_15min_O | <b>&lt;0.001</b> | <b>Yes</b> |

| MAP          | Vs.          | P-value      | Sig.       |
|--------------|--------------|--------------|------------|
| FFP2_15min_O | FFP2_15min_A | <b>0.003</b> | <b>Yes</b> |
|              | FFP2_30min_A | 1.25         | No         |
|              | Surg_15min_A | <b>0.005</b> | <b>Yes</b> |
|              | Surg_30min_A | 0.007        | No         |
|              | Surg_15min_O | <b>0.001</b> | <b>Yes</b> |

| Exhaled H <sub>2</sub> O | Vs.          | P-value          | Sig.       |
|--------------------------|--------------|------------------|------------|
| FFP2_15min_O             | FFP2_15min_A | <b>&lt;0.001</b> | <b>Yes</b> |
|                          | FFP2_30min_A | 0.37             | No         |
|                          | Surg_15min_A | <b>&lt;0.001</b> | <b>Yes</b> |
|                          | Surg_30min_A | <b>0.005</b>     | <b>Yes</b> |
|                          | Surg_15min_O | <b>0.001</b>     | <b>Yes</b> |

| Acetone      | Vs.          | P-value          | Sig.       |
|--------------|--------------|------------------|------------|
| FFP2_15min_O | FFP2_15min_A | 0.063            | No         |
|              | FFP2_30min_A | <b>&lt;0.001</b> | <b>Yes</b> |
|              | Surg_15min_A | 1.055            | No         |
|              | Surg_30min_A | <b>&lt;0.001</b> | <b>Yes</b> |
|              | Surg_15min_O | 1.121            | No         |

| Acetic acid  | Vs.          | P-value          | Sig.       |
|--------------|--------------|------------------|------------|
| FFP2_15min_O | FFP2_15min_A | 2.003            | No         |
|              | FFP2_30min_A | 1.301            | No         |
|              | Surg_15min_A | <b>0.001</b>     | <b>Yes</b> |
|              | FFP2_30min_A | <b>&lt;0.001</b> | <b>Yes</b> |
|              | Surg_15min_O | 0.554            | No         |

| Limonene     | Vs.          | P-value          | Sig.       |
|--------------|--------------|------------------|------------|
| FFP2_15min_O | FFP2_15min_A | <b>&lt;0.001</b> | <b>Yes</b> |
|              | FFP2_30min_A | <b>0.005</b>     | <b>Yes</b> |
|              | Surg_15min_A | <b>0.004</b>     | <b>Yes</b> |
|              | Surg_30min_A | <b>0.001</b>     | <b>Yes</b> |
|              | Surg_15min_O | 1.331            | No         |
